# Supplementary material for: Efficiency and Stability of Step-To Gait in Slow Walking
Source: Frontiers journal article supplement (doi:10.3389/fnhum.2021.779920), 2022-01-06
Supplement: Image_1.pdf [file Image_1.pdf]

## Supplementary Material

### 1 Supplementary Figure

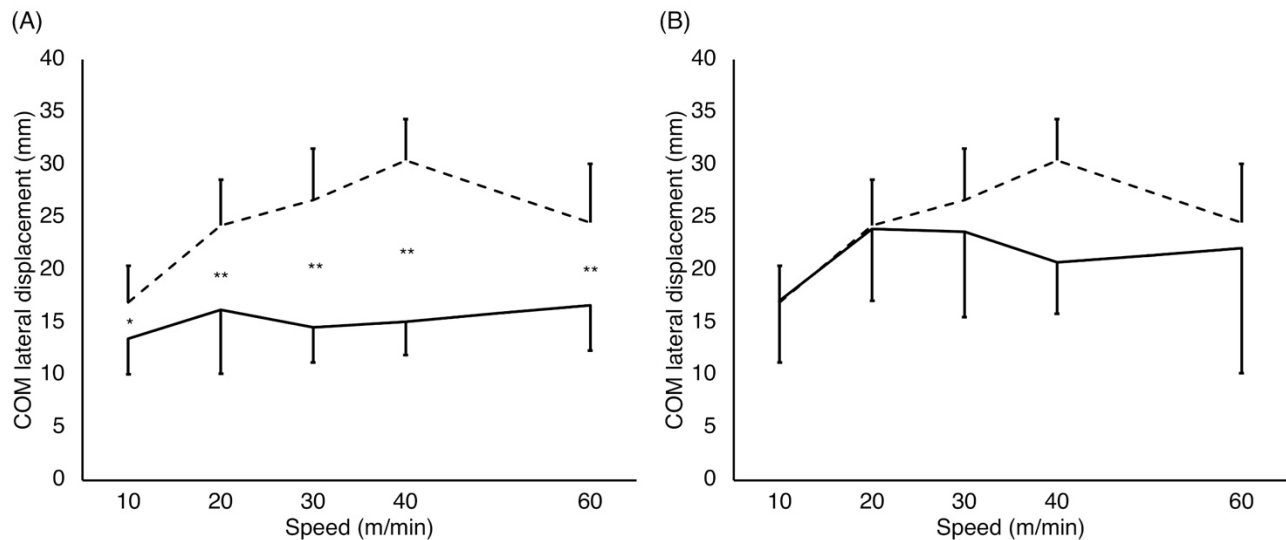

**Supplementary Figure 1.** CoM lateral displacement during single-leg stance-phase

The solid lines represent the CoM lateral displacement during the single-leg stance-phase of the following leg (A) and preceding leg (B) in the step-to gait. The dashed lines (A and B) represent the CoM lateral displacement during the single-leg stance-phase in the normal gait. The vertical and horizontal axes represent the CoM lateral displacement (mm) and gait speeds (m/min), respectively. For the CoM lateral displacement of the following-leg during the stance-phase (A), the two-way ANOVA showed a significant interaction (GAIT×SPEED) ( $F(1.77, 17.72) = 10.89, P < 0.01$ , partial  $\eta^2 = 0.52$ ). The significant main effects were observed in both factors of GAIT ( $F(1, 10) = 139.51, P < 0.01$ , partial  $\eta^2 = 0.93$ ) and SPEED ( $F(1.83, 18.3) = 15.42, P < 0.01$ , partial  $\eta^2 = 0.61$ ). The significant simple main effects of GAIT were observed at 10 m/min ( $P < 0.05$ ), 20 m/min, 30 m/min, 40 m/min, and 60 m/min ( $P < 0.01$ ). Therefore, these results showed that the CoM lateral displacement of the following-leg during the stance-phase was significantly smaller than that during the stance-phase in the normal gait for all speed conditions. For the CoM lateral displacement of the preceding-leg during the stance-phase (B), the two-way ANOVA did not show a significant interaction (GAIT×SPEED) ( $P = 0.06$ ). The significant main effects were observed in both factors of GAIT ( $F(1, 10) = 12.75, P < 0.01$ , partial  $\eta^2 = 0.56$ ) and SPEED ( $F(1.4, 13.9) = 6.23, P < 0.05$ , partial  $\eta^2 = 0.38$ ). \*\*:  $P < 0.01$  and \*:  $P < 0.05$ . Error bars: Standard deviation.
